# Supplementary material for: Undetectable Concentrations of a Food and Drug Administration–approved High‐sensitivity Cardiac Troponin T Assay to Rule Out Acute Myocardial Infarction at Emergency Department Arrival
Source: PubMed Central journal article supplement — Acad Emerg Med. 2017 Aug 11;24(10):1267–77. doi: 10.1111/acem.13229 (PMC5656889; doi:10.1111/acem.13229), 2017-08-11
Supplement: ACEM-24-1267-s001.pdf [file ACEM-24-1267-s001.pdf]

Figure S1a Sensitivity and Specificity across the range of initial hsTnT concentrations for 7-day AMI

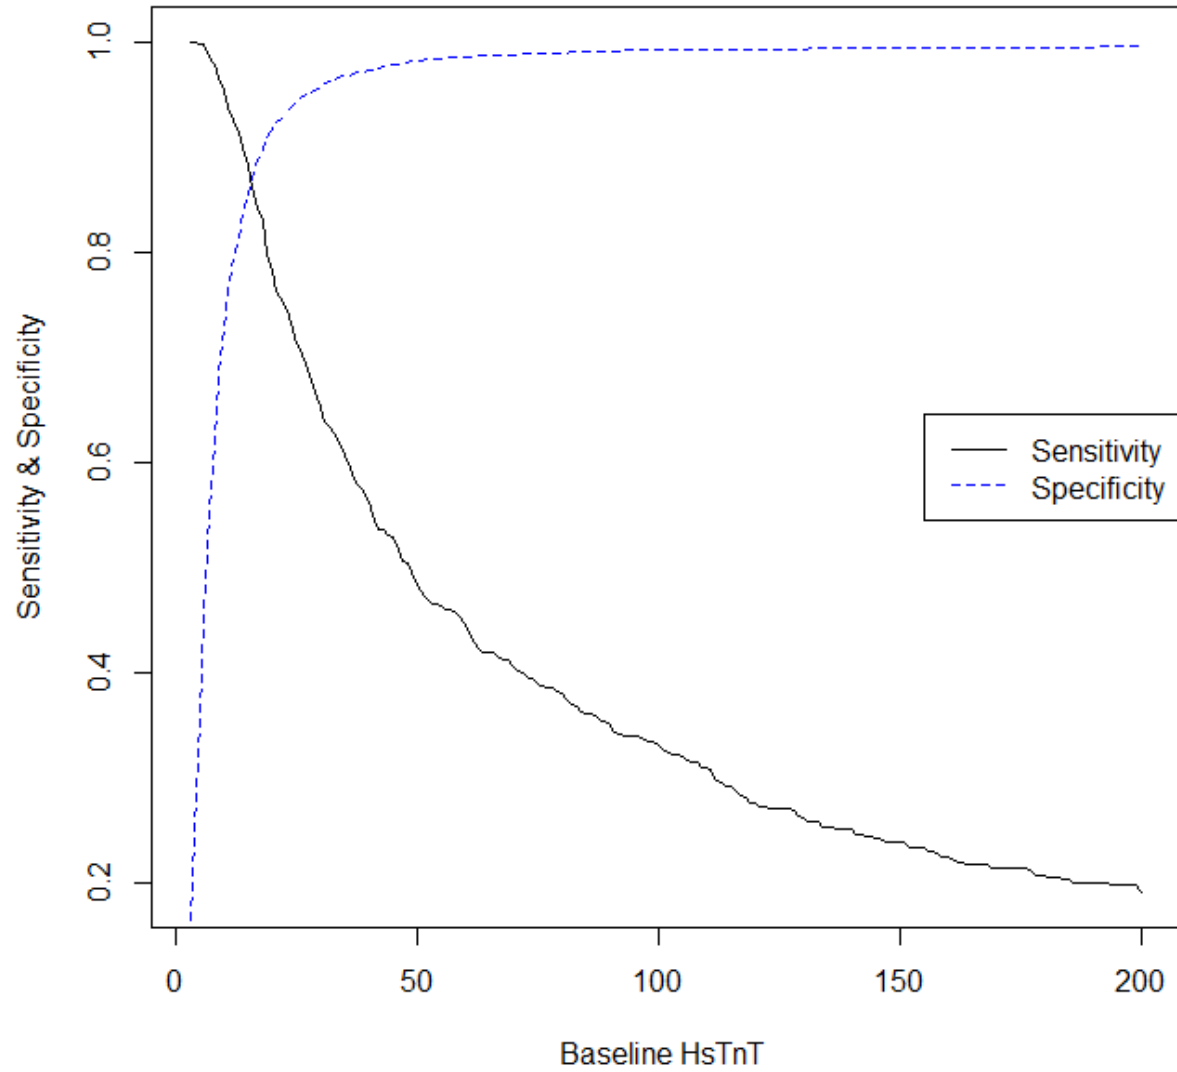

Figure S2b Sensitivity and Specificity across the range of initial hsTnT concentrations for 30-day AMI

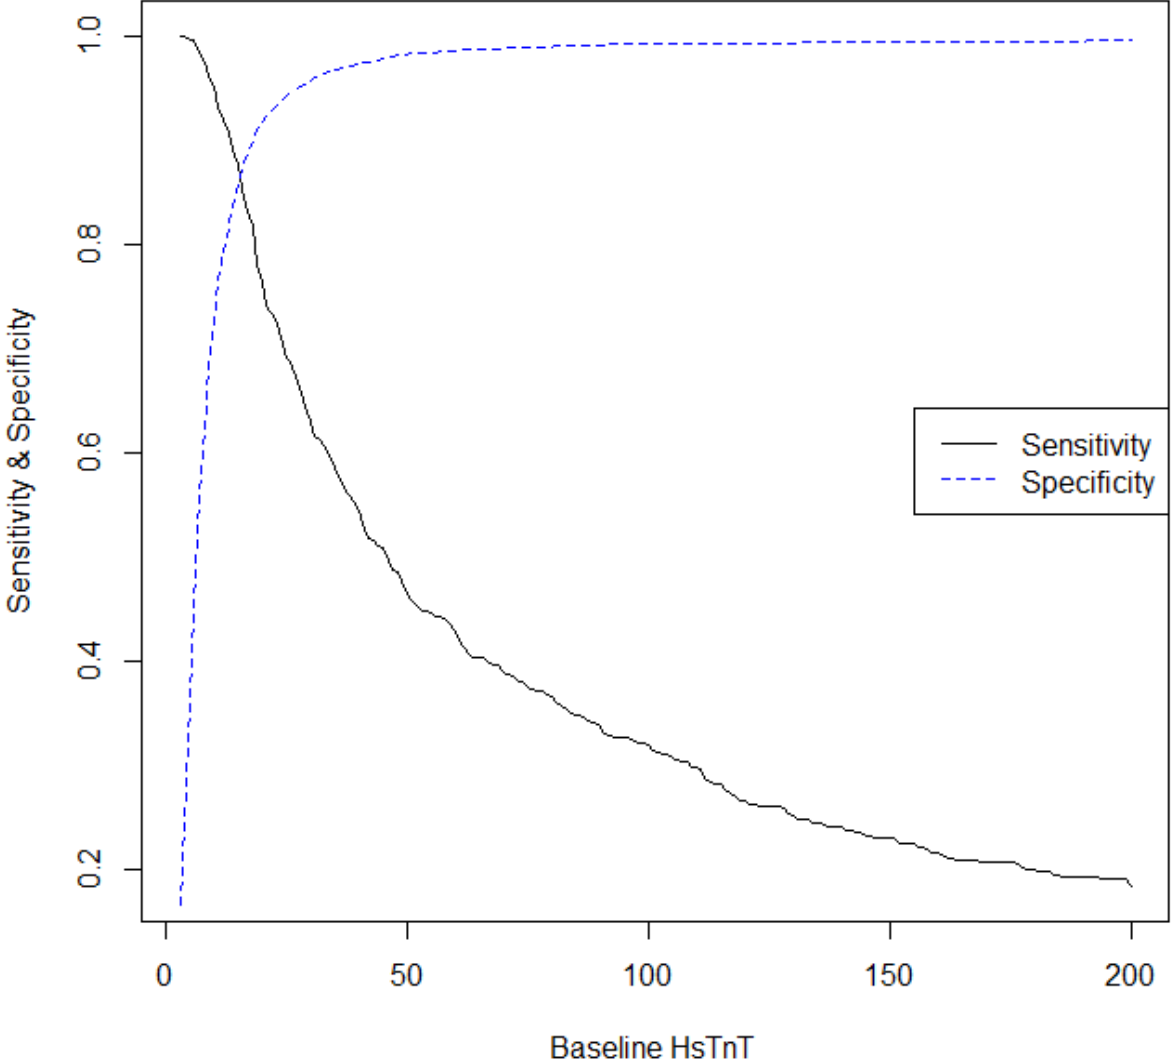

Figure S1c Sensitivity and Specificity across the range of initial hsTnT concentrations for 90-day AMI

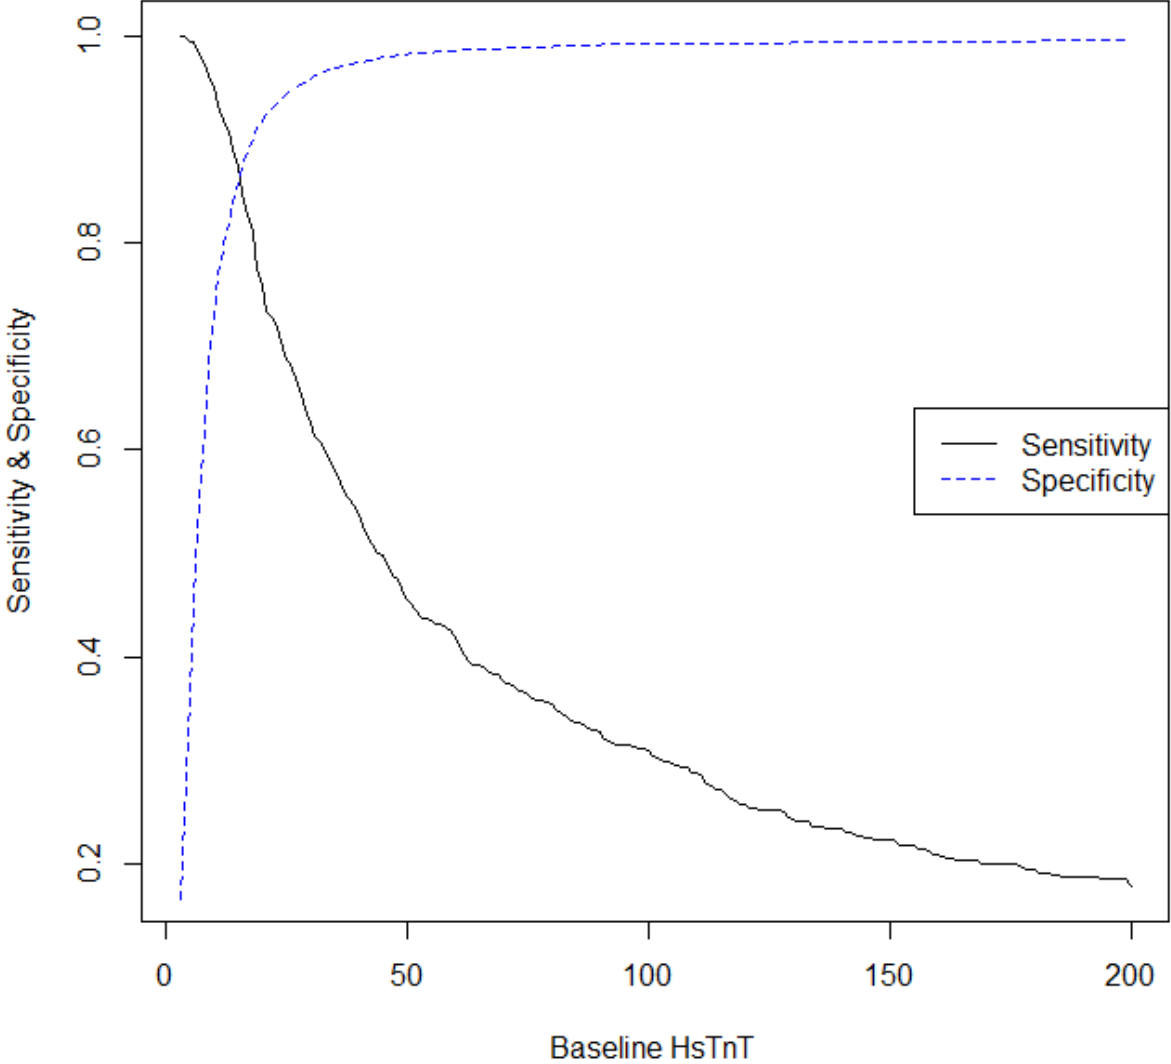

Table S1. Test characteristics for AMI across range of initial hsTnT values from <3-100ng/L

- Test characteristics are for values less than the value shown in each row, eg. Test characteristics in the row for the cutoff of 5ng/L are for hsTnT values <5ng/L.

| Cutoff | 7 Days |             |             |        |        | 30 days |             |             |        |        | 90 Days |             |             |        |        |
|--------|--------|-------------|-------------|--------|--------|---------|-------------|-------------|--------|--------|---------|-------------|-------------|--------|--------|
|        | Events | Sensitivity | Specificity | PPV    | NPV    | Events  | Sensitivity | Specificity | PPV    | NPV    | Events  | Sensitivity | Specificity | PPV    | NPV    |
| 3      | 0      | 1           | 0.1642      | 0.0682 | 1      | 0       | 1           | 0.1646      | 0.0708 | 1      | 0       | 1           | 0.165       | 0.0737 | 1      |
| 4      | 0      | 1           | 0.245       | 0.0749 | 1      | 0       | 1           | 0.2456      | 0.0779 | 1      | 0       | 1           | 0.2462      | 0.081  | 1      |
| 5      | 1      | 0.9976      | 0.3569      | 0.0867 | 0.9996 | 2       | 0.9953      | 0.3576      | 0.0898 | 0.9992 | 3       | 0.9932      | 0.3584      | 0.0932 | 0.9987 |
| 6      | 1      | 0.9976      | 0.4522      | 0.1002 | 0.9997 | 2       | 0.9953      | 0.4531      | 0.1039 | 0.9993 | 3       | 0.9932      | 0.4541      | 0.1078 | 0.999  |
| 7      | 6      | 0.9854      | 0.554       | 0.119  | 0.9984 | 7       | 0.9836      | 0.5551      | 0.1235 | 0.9981 | 8       | 0.982       | 0.5564      | 0.1282 | 0.9979 |
| 8      | 9      | 0.9781      | 0.6175      | 0.1353 | 0.9978 | 11      | 0.9742      | 0.6187      | 0.14   | 0.9974 | 12      | 0.973       | 0.6201      | 0.1454 | 0.9971 |
| 9      | 14     | 0.9659      | 0.6806      | 0.1561 | 0.9969 | 16      | 0.9625      | 0.6819      | 0.1616 | 0.9965 | 17      | 0.9617      | 0.6835      | 0.1679 | 0.9963 |
| 10     | 19     | 0.9538      | 0.7226      | 0.1738 | 0.9961 | 21      | 0.9508      | 0.724       | 0.18   | 0.9957 | 22      | 0.9505      | 0.7257      | 0.1871 | 0.9955 |
| 11     | 26     | 0.9367      | 0.7623      | 0.1942 | 0.9949 | 29      | 0.9321      | 0.7637      | 0.2008 | 0.9944 | 30      | 0.9324      | 0.7655      | 0.2089 | 0.9942 |
| 12     | 31     | 0.9246      | 0.7915      | 0.2134 | 0.9942 | 35      | 0.918       | 0.7928      | 0.2201 | 0.9935 | 36      | 0.9189      | 0.7946      | 0.2291 | 0.9933 |
| 13     | 35     | 0.9148      | 0.8152      | 0.2324 | 0.9937 | 40      | 0.9063      | 0.8164      | 0.2392 | 0.9927 | 41      | 0.9077      | 0.8183      | 0.2491 | 0.9926 |
| 14     | 42     | 0.8978      | 0.8345      | 0.2492 | 0.9926 | 47      | 0.8899      | 0.8357      | 0.2566 | 0.9917 | 49      | 0.8896      | 0.8376      | 0.2667 | 0.9913 |
| 15     | 48     | 0.8832      | 0.8547      | 0.2711 | 0.9917 | 53      | 0.8759      | 0.856       | 0.2793 | 0.9908 | 56      | 0.8739      | 0.8578      | 0.2898 | 0.9903 |
| 16     | 57     | 0.8613      | 0.8692      | 0.2871 | 0.9903 | 63      | 0.8525      | 0.8704      | 0.2952 | 0.9893 | 67      | 0.8491      | 0.872       | 0.3058 | 0.9886 |
| 17     | 65     | 0.8418      | 0.8853      | 0.3098 | 0.9892 | 72      | 0.8314      | 0.8863      | 0.3178 | 0.988  | 77      | 0.8266      | 0.8878      | 0.3286 | 0.9872 |
| 18     | 70     | 0.8297      | 0.8969      | 0.3298 | 0.9885 | 78      | 0.8173      | 0.8978      | 0.3375 | 0.9872 | 84      | 0.8108      | 0.8992      | 0.3482 | 0.9862 |
| 19     | 83     | 0.7981      | 0.9083      | 0.3475 | 0.9866 | 94      | 0.7799      | 0.9088      | 0.3528 | 0.9848 | 100     | 0.7748      | 0.9103      | 0.3644 | 0.9838 |
| 20     | 90     | 0.781       | 0.9155      | 0.3611 | 0.9856 | 101     | 0.7635      | 0.916       | 0.3667 | 0.9838 | 107     | 0.759       | 0.9174      | 0.3791 | 0.9829 |
| 21     | 98     | 0.7616      | 0.9222      | 0.3744 | 0.9844 | 111     | 0.74        | 0.9224      | 0.378  | 0.9824 | 118     | 0.7342      | 0.9237      | 0.39   | 0.9813 |
| 22     | 101    | 0.7543      | 0.9272      | 0.388  | 0.984  | 114     | 0.733       | 0.9275      | 0.3917 | 0.982  | 121     | 0.7275      | 0.9288      | 0.4043 | 0.9809 |
| 23     | 105    | 0.7445      | 0.9329      | 0.4042 | 0.9835 | 118     | 0.7237      | 0.9332      | 0.4082 | 0.9815 | 125     | 0.7185      | 0.9345      | 0.4214 | 0.9804 |
| 24     | 110    | 0.7324      | 0.9364      | 0.4135 | 0.9828 | 124     | 0.7096      | 0.9366      | 0.4162 | 0.9806 | 131     | 0.705       | 0.9379      | 0.4299 | 0.9795 |
| 25     | 118    | 0.7129      | 0.9418      | 0.4284 | 0.9817 | 132     | 0.6909      | 0.942       | 0.4313 | 0.9795 | 139     | 0.6869      | 0.9433      | 0.4459 | 0.9784 |
| 26     | 120    | 0.708       | 0.9458      | 0.4443 | 0.9815 | 134     | 0.6862      | 0.946       | 0.4473 | 0.9793 | 141     | 0.6824      | 0.9474      | 0.4626 | 0.9782 |

|    |     |        |        |        |        |     |        |        |        |        |     |        |        |        |        |
|----|-----|--------|--------|--------|--------|-----|--------|--------|--------|--------|-----|--------|--------|--------|--------|
| 27 | 126 | 0.6934 | 0.949  | 0.4538 | 0.9806 | 140 | 0.6721 | 0.9491 | 0.457  | 0.9785 | 147 | 0.6689 | 0.9505 | 0.4729 | 0.9774 |
| 28 | 133 | 0.6764 | 0.9506 | 0.4557 | 0.9796 | 147 | 0.6557 | 0.9508 | 0.459  | 0.9775 | 154 | 0.6532 | 0.9521 | 0.4754 | 0.9764 |
| 29 | 137 | 0.6667 | 0.9536 | 0.4676 | 0.9791 | 152 | 0.644  | 0.9536 | 0.4693 | 0.9768 | 160 | 0.6396 | 0.9548 | 0.4846 | 0.9756 |
| 30 | 143 | 0.6521 | 0.957  | 0.4811 | 0.9782 | 158 | 0.63   | 0.957  | 0.4829 | 0.976  | 166 | 0.6261 | 0.9583 | 0.4991 | 0.9747 |
| 31 | 149 | 0.6375 | 0.9597 | 0.4916 | 0.9774 | 164 | 0.6159 | 0.9597 | 0.4934 | 0.9751 | 172 | 0.6126 | 0.961  | 0.5103 | 0.9739 |
| 32 | 151 | 0.6326 | 0.9615 | 0.501  | 0.9772 | 166 | 0.6112 | 0.9615 | 0.5029 | 0.9749 | 174 | 0.6081 | 0.9628 | 0.5202 | 0.9737 |
| 33 | 154 | 0.6253 | 0.9637 | 0.513  | 0.9768 | 169 | 0.6042 | 0.9637 | 0.515  | 0.9745 | 178 | 0.5991 | 0.9649 | 0.5309 | 0.9731 |
| 34 | 157 | 0.618  | 0.965  | 0.5194 | 0.9764 | 172 | 0.5972 | 0.9651 | 0.5215 | 0.9741 | 181 | 0.5923 | 0.9662 | 0.5378 | 0.9727 |
| 35 | 162 | 0.6058 | 0.9668 | 0.5275 | 0.9757 | 177 | 0.5855 | 0.9669 | 0.5297 | 0.9734 | 186 | 0.5811 | 0.968  | 0.5466 | 0.9721 |
| 36 | 165 | 0.5985 | 0.9673 | 0.5279 | 0.9752 | 180 | 0.5785 | 0.9673 | 0.53   | 0.973  | 189 | 0.5743 | 0.9684 | 0.5472 | 0.9716 |
| 37 | 171 | 0.5839 | 0.969  | 0.5357 | 0.9744 | 186 | 0.5644 | 0.9691 | 0.5379 | 0.9722 | 196 | 0.5586 | 0.9701 | 0.5536 | 0.9707 |
| 38 | 174 | 0.5766 | 0.9707 | 0.5461 | 0.974  | 189 | 0.5574 | 0.9708 | 0.5484 | 0.9718 | 199 | 0.5518 | 0.9717 | 0.5645 | 0.9703 |
| 39 | 176 | 0.5718 | 0.9713 | 0.5491 | 0.9737 | 191 | 0.5527 | 0.9714 | 0.5514 | 0.9715 | 201 | 0.5473 | 0.9723 | 0.5678 | 0.97   |
| 40 | 180 | 0.562  | 0.9723 | 0.554  | 0.9732 | 195 | 0.5433 | 0.9724 | 0.5564 | 0.971  | 205 | 0.5383 | 0.9734 | 0.5731 | 0.9695 |
| 41 | 185 | 0.5499 | 0.9735 | 0.5594 | 0.9725 | 200 | 0.5316 | 0.9736 | 0.5619 | 0.9703 | 210 | 0.527  | 0.9746 | 0.5792 | 0.9688 |
| 42 | 191 | 0.5353 | 0.9744 | 0.5612 | 0.9717 | 206 | 0.5176 | 0.9745 | 0.5638 | 0.9694 | 216 | 0.5135 | 0.9755 | 0.5816 | 0.9679 |
| 43 | 191 | 0.5353 | 0.9759 | 0.5759 | 0.9717 | 207 | 0.5152 | 0.9758 | 0.5759 | 0.9693 | 219 | 0.5068 | 0.9765 | 0.589  | 0.9675 |
| 44 | 193 | 0.5304 | 0.9766 | 0.5813 | 0.9714 | 209 | 0.5105 | 0.9766 | 0.5813 | 0.9691 | 222 | 0.5    | 0.9771 | 0.592  | 0.9671 |
| 45 | 194 | 0.528  | 0.9781 | 0.5962 | 0.9713 | 210 | 0.5082 | 0.9781 | 0.5962 | 0.969  | 223 | 0.4977 | 0.9786 | 0.6071 | 0.967  |
| 46 | 197 | 0.5207 | 0.9787 | 0.5994 | 0.9709 | 213 | 0.5012 | 0.9787 | 0.5994 | 0.9686 | 226 | 0.491  | 0.9792 | 0.6106 | 0.9666 |
| 47 | 203 | 0.5061 | 0.9796 | 0.6029 | 0.9701 | 219 | 0.4871 | 0.9796 | 0.6029 | 0.9677 | 232 | 0.4775 | 0.9801 | 0.6145 | 0.9658 |
| 48 | 204 | 0.5036 | 0.9805 | 0.6124 | 0.97   | 220 | 0.4848 | 0.9805 | 0.6124 | 0.9676 | 233 | 0.4752 | 0.981  | 0.6243 | 0.9657 |
| 49 | 208 | 0.4939 | 0.9811 | 0.6152 | 0.9694 | 224 | 0.4754 | 0.9811 | 0.6152 | 0.9671 | 237 | 0.4662 | 0.9816 | 0.6273 | 0.9651 |
| 50 | 213 | 0.4818 | 0.9814 | 0.613  | 0.9687 | 229 | 0.4637 | 0.9814 | 0.613  | 0.9664 | 242 | 0.455  | 0.9819 | 0.6254 | 0.9644 |
| 51 | 215 | 0.4769 | 0.9823 | 0.6222 | 0.9685 | 231 | 0.459  | 0.9822 | 0.6222 | 0.9661 | 244 | 0.4505 | 0.9828 | 0.6349 | 0.9642 |
| 52 | 218 | 0.4696 | 0.9824 | 0.6206 | 0.968  | 234 | 0.452  | 0.9824 | 0.6206 | 0.9657 | 247 | 0.4437 | 0.9829 | 0.6334 | 0.9638 |
| 53 | 220 | 0.4647 | 0.9829 | 0.6242 | 0.9678 | 236 | 0.4473 | 0.9828 | 0.6242 | 0.9654 | 250 | 0.4369 | 0.9832 | 0.634  | 0.9634 |
| 54 | 220 | 0.4647 | 0.983  | 0.6262 | 0.9678 | 236 | 0.4473 | 0.983  | 0.6262 | 0.9654 | 250 | 0.4369 | 0.9834 | 0.6361 | 0.9634 |
| 55 | 221 | 0.4623 | 0.9832 | 0.6271 | 0.9676 | 237 | 0.445  | 0.9831 | 0.6271 | 0.9653 | 251 | 0.4347 | 0.9835 | 0.637  | 0.9632 |
| 56 | 222 | 0.4599 | 0.9838 | 0.6342 | 0.9675 | 238 | 0.4426 | 0.9837 | 0.6342 | 0.9652 | 252 | 0.4324 | 0.9841 | 0.6443 | 0.9631 |

|    |     |        |        |        |        |     |        |        |        |        |     |        |        |        |        |
|----|-----|--------|--------|--------|--------|-----|--------|--------|--------|--------|-----|--------|--------|--------|--------|
| 57 | 222 | 0.4599 | 0.9847 | 0.6473 | 0.9675 | 238 | 0.4426 | 0.9846 | 0.6473 | 0.9652 | 252 | 0.4324 | 0.985  | 0.6575 | 0.9631 |
| 58 | 224 | 0.455  | 0.9848 | 0.6471 | 0.9673 | 240 | 0.4379 | 0.9848 | 0.6471 | 0.9649 | 254 | 0.4279 | 0.9852 | 0.6574 | 0.9629 |
| 59 | 225 | 0.4526 | 0.9851 | 0.6503 | 0.9671 | 241 | 0.4356 | 0.9851 | 0.6503 | 0.9648 | 255 | 0.4257 | 0.9855 | 0.6608 | 0.9627 |
| 60 | 228 | 0.4453 | 0.9853 | 0.6489 | 0.9667 | 244 | 0.4286 | 0.9852 | 0.6489 | 0.9644 | 258 | 0.4189 | 0.9856 | 0.6596 | 0.9623 |
| 61 | 232 | 0.4355 | 0.9853 | 0.6439 | 0.9661 | 248 | 0.4192 | 0.9852 | 0.6439 | 0.9638 | 262 | 0.4099 | 0.9856 | 0.6547 | 0.9618 |
| 62 | 235 | 0.4282 | 0.9859 | 0.6494 | 0.9657 | 251 | 0.4122 | 0.9858 | 0.6494 | 0.9634 | 266 | 0.4009 | 0.9861 | 0.6568 | 0.9612 |
| 63 | 238 | 0.4209 | 0.9859 | 0.6455 | 0.9653 | 254 | 0.4052 | 0.9858 | 0.6455 | 0.963  | 269 | 0.3941 | 0.9861 | 0.653  | 0.9608 |
| 64 | 239 | 0.4185 | 0.9859 | 0.6442 | 0.9652 | 255 | 0.4028 | 0.9858 | 0.6442 | 0.9628 | 270 | 0.3919 | 0.9861 | 0.6517 | 0.9607 |
| 65 | 239 | 0.4185 | 0.9862 | 0.6491 | 0.9652 | 255 | 0.4028 | 0.9861 | 0.6491 | 0.9629 | 270 | 0.3919 | 0.9864 | 0.6566 | 0.9607 |
| 66 | 239 | 0.4185 | 0.9865 | 0.654  | 0.9652 | 255 | 0.4028 | 0.9864 | 0.654  | 0.9629 | 271 | 0.3896 | 0.9865 | 0.6578 | 0.9605 |
| 67 | 241 | 0.4136 | 0.9868 | 0.6564 | 0.9649 | 257 | 0.3981 | 0.9867 | 0.6564 | 0.9626 | 273 | 0.3851 | 0.9868 | 0.6602 | 0.9603 |
| 68 | 242 | 0.4112 | 0.9871 | 0.6602 | 0.9648 | 258 | 0.3958 | 0.987  | 0.6602 | 0.9625 | 274 | 0.3829 | 0.9871 | 0.6641 | 0.9601 |
| 69 | 242 | 0.4112 | 0.9871 | 0.6602 | 0.9648 | 258 | 0.3958 | 0.987  | 0.6602 | 0.9625 | 274 | 0.3829 | 0.9871 | 0.6641 | 0.9601 |
| 70 | 245 | 0.4039 | 0.9875 | 0.664  | 0.9644 | 261 | 0.3888 | 0.9875 | 0.664  | 0.9621 | 277 | 0.3761 | 0.9876 | 0.668  | 0.9597 |
| 71 | 246 | 0.4015 | 0.9876 | 0.6653 | 0.9643 | 262 | 0.3864 | 0.9876 | 0.6653 | 0.9619 | 278 | 0.3739 | 0.9877 | 0.6694 | 0.9596 |
| 72 | 247 | 0.399  | 0.9879 | 0.6694 | 0.9641 | 263 | 0.3841 | 0.9879 | 0.6694 | 0.9618 | 279 | 0.3716 | 0.988  | 0.6735 | 0.9595 |
| 73 | 249 | 0.3942 | 0.9879 | 0.6667 | 0.9638 | 265 | 0.3794 | 0.9879 | 0.6667 | 0.9615 | 281 | 0.3671 | 0.988  | 0.6708 | 0.9592 |
| 74 | 249 | 0.3942 | 0.9879 | 0.6667 | 0.9638 | 265 | 0.3794 | 0.9879 | 0.6667 | 0.9615 | 281 | 0.3671 | 0.988  | 0.6708 | 0.9592 |
| 75 | 251 | 0.3893 | 0.9879 | 0.6639 | 0.9636 | 267 | 0.3747 | 0.9879 | 0.6639 | 0.9612 | 283 | 0.3626 | 0.988  | 0.668  | 0.9589 |
| 76 | 252 | 0.3869 | 0.9882 | 0.6681 | 0.9634 | 268 | 0.3724 | 0.9882 | 0.6681 | 0.9611 | 284 | 0.3604 | 0.9883 | 0.6723 | 0.9588 |
| 77 | 253 | 0.3844 | 0.9888 | 0.6781 | 0.9633 | 269 | 0.37   | 0.9888 | 0.6781 | 0.961  | 285 | 0.3581 | 0.9889 | 0.6824 | 0.9587 |
| 78 | 253 | 0.3844 | 0.989  | 0.681  | 0.9633 | 269 | 0.37   | 0.989  | 0.681  | 0.961  | 285 | 0.3581 | 0.9891 | 0.6853 | 0.9587 |
| 79 | 254 | 0.382  | 0.9891 | 0.6826 | 0.9632 | 270 | 0.3677 | 0.9891 | 0.6826 | 0.9609 | 286 | 0.3559 | 0.9892 | 0.687  | 0.9586 |
| 80 | 255 | 0.3796 | 0.9891 | 0.6812 | 0.963  | 271 | 0.3653 | 0.9891 | 0.6812 | 0.9607 | 287 | 0.3536 | 0.9892 | 0.6856 | 0.9584 |
| 81 | 257 | 0.3747 | 0.9894 | 0.6844 | 0.9628 | 273 | 0.3607 | 0.9894 | 0.6844 | 0.9605 | 289 | 0.3491 | 0.9895 | 0.6889 | 0.9581 |
| 82 | 259 | 0.3698 | 0.9897 | 0.6878 | 0.9625 | 275 | 0.356  | 0.9897 | 0.6878 | 0.9602 | 291 | 0.3446 | 0.9898 | 0.6923 | 0.9579 |
| 83 | 260 | 0.3674 | 0.99   | 0.6927 | 0.9624 | 276 | 0.3536 | 0.99   | 0.6927 | 0.9601 | 292 | 0.3423 | 0.9901 | 0.6972 | 0.9578 |
| 84 | 262 | 0.3625 | 0.99   | 0.6898 | 0.9621 | 278 | 0.3489 | 0.99   | 0.6898 | 0.9598 | 294 | 0.3378 | 0.9901 | 0.6944 | 0.9575 |
| 85 | 263 | 0.3601 | 0.9903 | 0.6948 | 0.962  | 279 | 0.3466 | 0.9903 | 0.6948 | 0.9597 | 295 | 0.3356 | 0.9904 | 0.6995 | 0.9574 |
| 86 | 263 | 0.3601 | 0.9903 | 0.6948 | 0.962  | 279 | 0.3466 | 0.9903 | 0.6948 | 0.9597 | 295 | 0.3356 | 0.9904 | 0.6995 | 0.9574 |

|     |     |        |        |        |        |     |        |        |        |        |     |        |        |        |        |
|-----|-----|--------|--------|--------|--------|-----|--------|--------|--------|--------|-----|--------|--------|--------|--------|
| 87  | 264 | 0.3577 | 0.9905 | 0.6967 | 0.9618 | 280 | 0.3443 | 0.9905 | 0.6967 | 0.9595 | 296 | 0.3333 | 0.9906 | 0.7014 | 0.9572 |
| 88  | 266 | 0.3528 | 0.9906 | 0.6971 | 0.9616 | 282 | 0.3396 | 0.9906 | 0.6971 | 0.9593 | 298 | 0.3288 | 0.9907 | 0.7019 | 0.9569 |
| 89  | 266 | 0.3528 | 0.9908 | 0.7005 | 0.9616 | 282 | 0.3396 | 0.9908 | 0.7005 | 0.9593 | 298 | 0.3288 | 0.9909 | 0.7053 | 0.957  |
| 90  | 267 | 0.3504 | 0.9908 | 0.699  | 0.9614 | 283 | 0.3372 | 0.9908 | 0.699  | 0.9591 | 299 | 0.3266 | 0.9909 | 0.7039 | 0.9568 |
| 91  | 270 | 0.3431 | 0.9911 | 0.7015 | 0.961  | 286 | 0.3302 | 0.991  | 0.7015 | 0.9587 | 302 | 0.3198 | 0.9912 | 0.7065 | 0.9564 |
| 92  | 271 | 0.3406 | 0.9912 | 0.7035 | 0.9609 | 287 | 0.3279 | 0.9912 | 0.7035 | 0.9586 | 303 | 0.3176 | 0.9913 | 0.7085 | 0.9563 |
| 93  | 272 | 0.3382 | 0.9914 | 0.7056 | 0.9608 | 288 | 0.3255 | 0.9913 | 0.7056 | 0.9585 | 304 | 0.3153 | 0.9915 | 0.7107 | 0.9562 |
| 94  | 272 | 0.3382 | 0.9914 | 0.7056 | 0.9608 | 288 | 0.3255 | 0.9913 | 0.7056 | 0.9585 | 304 | 0.3153 | 0.9915 | 0.7107 | 0.9562 |
| 95  | 272 | 0.3382 | 0.9915 | 0.7092 | 0.9608 | 288 | 0.3255 | 0.9915 | 0.7092 | 0.9585 | 304 | 0.3153 | 0.9916 | 0.7143 | 0.9562 |
| 96  | 272 | 0.3382 | 0.9917 | 0.7128 | 0.9608 | 288 | 0.3255 | 0.9916 | 0.7128 | 0.9585 | 304 | 0.3153 | 0.9918 | 0.7179 | 0.9562 |
| 97  | 273 | 0.3358 | 0.9918 | 0.715  | 0.9606 | 289 | 0.3232 | 0.9918 | 0.715  | 0.9583 | 305 | 0.3131 | 0.9919 | 0.7202 | 0.956  |
| 98  | 274 | 0.3333 | 0.992  | 0.7173 | 0.9605 | 290 | 0.3208 | 0.9919 | 0.7173 | 0.9582 | 306 | 0.3108 | 0.9921 | 0.7225 | 0.9559 |
| 99  | 274 | 0.3333 | 0.992  | 0.7173 | 0.9605 | 290 | 0.3208 | 0.9919 | 0.7173 | 0.9582 | 306 | 0.3108 | 0.9921 | 0.7225 | 0.9559 |
| 100 | 275 | 0.3309 | 0.992  | 0.7158 | 0.9604 | 291 | 0.3185 | 0.9919 | 0.7158 | 0.9581 | 307 | 0.3086 | 0.9921 | 0.7211 | 0.9558 |

Table S2. Test characteristics for MACE across range of initial hsTnT values from <3-100ng/L

- Test characteristics are for values less than the value shown in each row, eg. Test characteristics in the row for the cutoff of 5ng/L are for hsTnT values <5ng/L.

| Cutoff | 7 days |             |             |        |        | 30 days |             |             |        |        | 90 days |             |             |        |        |
|--------|--------|-------------|-------------|--------|--------|---------|-------------|-------------|--------|--------|---------|-------------|-------------|--------|--------|
|        | Events | Sensitivity | Specificity | PPV    | NPV    | Event   | Sensitivity | Specificity | PPV    | NPV    | Event   | Sensitivity | Specificity | PPV    | NPV    |
| 3      | 2      | 0.996       | 0.1659      | 0.0816 | 0.9982 | 3       | 0.9946      | 0.1672      | 0.0909 | 0.9973 | 3       | 0.9951      | 0.1687      | 0.1007 | 0.9973 |
| 4      | 3      | 0.9939      | 0.2476      | 0.0895 | 0.9982 | 6       | 0.9891      | 0.2493      | 0.0994 | 0.9964 | 6       | 0.9902      | 0.2515      | 0.1101 | 0.9964 |
| 5      | 13     | 0.9737      | 0.3596      | 0.1017 | 0.9946 | 19      | 0.9655      | 0.3618      | 0.1124 | 0.9921 | 22      | 0.9639      | 0.3646      | 0.1243 | 0.9908 |
| 6      | 17     | 0.9656      | 0.4554      | 0.1166 | 0.9944 | 26      | 0.9528      | 0.458       | 0.1283 | 0.9914 | 30      | 0.9508      | 0.4615      | 0.1418 | 0.9901 |
| 7      | 29     | 0.9413      | 0.5574      | 0.1367 | 0.9922 | 40      | 0.9274      | 0.5606      | 0.1502 | 0.9893 | 45      | 0.9262      | 0.5649      | 0.1661 | 0.9879 |
| 8      | 38     | 0.9231      | 0.6209      | 0.1534 | 0.9909 | 53      | 0.9038      | 0.624       | 0.1676 | 0.9873 | 60      | 0.9016      | 0.6285      | 0.1851 | 0.9856 |
| 9      | 45     | 0.9089      | 0.6844      | 0.1766 | 0.9902 | 63      | 0.8857      | 0.6876      | 0.1919 | 0.9863 | 74      | 0.8787      | 0.6922      | 0.2108 | 0.9839 |
| 10     | 53     | 0.8927      | 0.7265      | 0.1955 | 0.9891 | 73      | 0.8675      | 0.7297      | 0.2119 | 0.985  | 90      | 0.8525      | 0.7337      | 0.2305 | 0.9815 |
| 11     | 66     | 0.8664      | 0.7658      | 0.2159 | 0.9872 | 90      | 0.8367      | 0.7688      | 0.2326 | 0.9825 | 110     | 0.8197      | 0.7727      | 0.2523 | 0.9786 |
| 12     | 72     | 0.8543      | 0.7952      | 0.2369 | 0.9865 | 98      | 0.8221      | 0.7981      | 0.2544 | 0.9817 | 119     | 0.8049      | 0.8021      | 0.2757 | 0.9778 |
| 13     | 80     | 0.8381      | 0.8186      | 0.2559 | 0.9855 | 107     | 0.8058      | 0.8216      | 0.2744 | 0.9806 | 131     | 0.7852      | 0.8253      | 0.296  | 0.9762 |
| 14     | 90     | 0.8178      | 0.8377      | 0.2728 | 0.9841 | 118     | 0.7858      | 0.8407      | 0.2924 | 0.9791 | 145     | 0.7623      | 0.8442      | 0.314  | 0.9743 |
| 15     | 100    | 0.7976      | 0.8576      | 0.2942 | 0.9827 | 128     | 0.7677      | 0.8608      | 0.3159 | 0.9779 | 158     | 0.741       | 0.864       | 0.3376 | 0.9727 |
| 16     | 110    | 0.7773      | 0.8721      | 0.3114 | 0.9813 | 141     | 0.7441      | 0.8749      | 0.3325 | 0.9761 | 173     | 0.7164      | 0.8779      | 0.3544 | 0.9707 |
| 17     | 123    | 0.751       | 0.8876      | 0.3321 | 0.9795 | 155     | 0.7187      | 0.8904      | 0.3545 | 0.9742 | 190     | 0.6885      | 0.8931      | 0.376  | 0.9684 |
| 18     | 132    | 0.7328      | 0.8987      | 0.3501 | 0.9783 | 165     | 0.7005      | 0.9015      | 0.3733 | 0.9729 | 201     | 0.6705      | 0.9041      | 0.3956 | 0.967  |
| 19     | 147    | 0.7024      | 0.91        | 0.3676 | 0.9762 | 185     | 0.6642      | 0.9121      | 0.3877 | 0.9701 | 221     | 0.6377      | 0.9149      | 0.4121 | 0.9643 |
| 20     | 158    | 0.6802      | 0.9167      | 0.378  | 0.9747 | 198     | 0.6407      | 0.9185      | 0.3971 | 0.9683 | 234     | 0.6164      | 0.9213      | 0.4229 | 0.9625 |
| 21     | 167    | 0.6619      | 0.9233      | 0.3911 | 0.9735 | 210     | 0.6189      | 0.9248      | 0.4079 | 0.9666 | 247     | 0.5951      | 0.9275      | 0.4342 | 0.9608 |
| 22     | 171    | 0.6538      | 0.9283      | 0.4043 | 0.973  | 215     | 0.6098      | 0.9296      | 0.4205 | 0.966  | 252     | 0.5869      | 0.9324      | 0.4481 | 0.9602 |
| 23     | 175    | 0.6457      | 0.934       | 0.4214 | 0.9725 | 219     | 0.6025      | 0.9354      | 0.4386 | 0.9656 | 257     | 0.5787      | 0.938       | 0.4663 | 0.9597 |
| 24     | 182    | 0.6316      | 0.9373      | 0.4286 | 0.9716 | 228     | 0.5862      | 0.9384      | 0.4437 | 0.9644 | 267     | 0.5623      | 0.941       | 0.4712 | 0.9583 |



|    |     |        |        |        |        |     |        |        |        |        |     |        |        |        |        |
|----|-----|--------|--------|--------|--------|-----|--------|--------|--------|--------|-----|--------|--------|--------|--------|
| 25 | 192 | 0.6113 | 0.9424 | 0.4415 | 0.9702 | 238 | 0.5681 | 0.9436 | 0.4576 | 0.9631 | 277 | 0.5459 | 0.9462 | 0.4868 | 0.957  |
| 26 | 195 | 0.6053 | 0.9464 | 0.4565 | 0.9699 | 242 | 0.5608 | 0.9474 | 0.4718 | 0.9626 | 281 | 0.5393 | 0.95   | 0.5023 | 0.9566 |
| 27 | 202 | 0.5911 | 0.9494 | 0.465  | 0.9689 | 249 | 0.5481 | 0.9504 | 0.4809 | 0.9617 | 288 | 0.5279 | 0.9531 | 0.5127 | 0.9557 |
| 28 | 209 | 0.5769 | 0.951  | 0.4672 | 0.9679 | 256 | 0.5354 | 0.9521 | 0.4836 | 0.9607 | 295 | 0.5164 | 0.9548 | 0.5164 | 0.9548 |
| 29 | 214 | 0.5668 | 0.9539 | 0.4778 | 0.9673 | 263 | 0.5227 | 0.9547 | 0.4915 | 0.9598 | 303 | 0.5033 | 0.9572 | 0.5239 | 0.9537 |
| 30 | 220 | 0.5547 | 0.9574 | 0.4919 | 0.9665 | 269 | 0.5118 | 0.9582 | 0.5063 | 0.9591 | 309 | 0.4934 | 0.9607 | 0.5404 | 0.953  |
| 31 | 227 | 0.5405 | 0.9599 | 0.5009 | 0.9656 | 277 | 0.4973 | 0.9606 | 0.5141 | 0.958  | 318 | 0.4787 | 0.963  | 0.5478 | 0.9518 |
| 32 | 229 | 0.5364 | 0.9617 | 0.5106 | 0.9654 | 279 | 0.4936 | 0.9625 | 0.5241 | 0.9578 | 320 | 0.4754 | 0.9649 | 0.5588 | 0.9516 |
| 33 | 232 | 0.5304 | 0.964  | 0.523  | 0.965  | 282 | 0.4882 | 0.9647 | 0.5369 | 0.9575 | 324 | 0.4689 | 0.967  | 0.5709 | 0.9511 |
| 34 | 235 | 0.5243 | 0.9653 | 0.5297 | 0.9646 | 286 | 0.4809 | 0.966  | 0.5419 | 0.9569 | 329 | 0.4607 | 0.9681 | 0.5746 | 0.9505 |
| 35 | 240 | 0.5142 | 0.9671 | 0.5381 | 0.964  | 292 | 0.4701 | 0.9676 | 0.5487 | 0.9561 | 336 | 0.4492 | 0.9696 | 0.5805 | 0.9495 |
| 36 | 243 | 0.5081 | 0.9676 | 0.5386 | 0.9635 | 295 | 0.4646 | 0.9681 | 0.5494 | 0.9557 | 339 | 0.4443 | 0.9701 | 0.5815 | 0.9491 |
| 37 | 249 | 0.496  | 0.9694 | 0.5469 | 0.9627 | 301 | 0.4537 | 0.9699 | 0.558  | 0.955  | 348 | 0.4295 | 0.9715 | 0.5848 | 0.9479 |
| 38 | 253 | 0.4879 | 0.9709 | 0.5553 | 0.9622 | 305 | 0.4465 | 0.9714 | 0.5668 | 0.9545 | 352 | 0.423  | 0.973  | 0.5945 | 0.9474 |
| 39 | 255 | 0.4838 | 0.9715 | 0.5584 | 0.962  | 307 | 0.4428 | 0.972  | 0.5701 | 0.9542 | 355 | 0.418  | 0.9735 | 0.5958 | 0.947  |
| 40 | 260 | 0.4737 | 0.9724 | 0.5612 | 0.9613 | 312 | 0.4338 | 0.9729 | 0.5731 | 0.9535 | 361 | 0.4082 | 0.9742 | 0.5971 | 0.9462 |
| 41 | 266 | 0.4615 | 0.9735 | 0.5644 | 0.9605 | 318 | 0.4229 | 0.974  | 0.5767 | 0.9527 | 367 | 0.3984 | 0.9753 | 0.6015 | 0.9454 |
| 42 | 272 | 0.4494 | 0.9744 | 0.5663 | 0.9596 | 325 | 0.4102 | 0.9748 | 0.5765 | 0.9518 | 374 | 0.3869 | 0.9761 | 0.602  | 0.9445 |
| 43 | 273 | 0.4474 | 0.9757 | 0.5785 | 0.9595 | 328 | 0.4047 | 0.9758 | 0.5838 | 0.9514 | 379 | 0.3787 | 0.9768 | 0.6047 | 0.9438 |
| 44 | 275 | 0.4433 | 0.9765 | 0.584  | 0.9593 | 330 | 0.4011 | 0.9766 | 0.5893 | 0.9511 | 383 | 0.3721 | 0.9773 | 0.6053 | 0.9433 |
| 45 | 276 | 0.4413 | 0.978  | 0.5989 | 0.9592 | 331 | 0.3993 | 0.9781 | 0.6044 | 0.9511 | 384 | 0.3705 | 0.9788 | 0.6209 | 0.9432 |
| 46 | 279 | 0.4352 | 0.9786 | 0.6022 | 0.9588 | 334 | 0.3938 | 0.9787 | 0.6078 | 0.9507 | 387 | 0.3656 | 0.9794 | 0.6246 | 0.9429 |
| 47 | 285 | 0.4231 | 0.9795 | 0.6058 | 0.958  | 340 | 0.3829 | 0.9796 | 0.6116 | 0.9499 | 393 | 0.3557 | 0.9804 | 0.629  | 0.9421 |
| 48 | 286 | 0.4211 | 0.9804 | 0.6154 | 0.9579 | 341 | 0.3811 | 0.9805 | 0.6213 | 0.9498 | 394 | 0.3541 | 0.9813 | 0.6391 | 0.942  |
| 49 | 291 | 0.4109 | 0.9809 | 0.6152 | 0.9572 | 346 | 0.3721 | 0.981  | 0.6212 | 0.9491 | 399 | 0.3459 | 0.9817 | 0.6394 | 0.9413 |
| 50 | 296 | 0.4008 | 0.9812 | 0.613  | 0.9565 | 351 | 0.363  | 0.9813 | 0.6192 | 0.9484 | 404 | 0.3377 | 0.9821 | 0.6378 | 0.9406 |
| 51 | 298 | 0.3968 | 0.9821 | 0.6222 | 0.9563 | 353 | 0.3593 | 0.9822 | 0.6286 | 0.9482 | 406 | 0.3344 | 0.983  | 0.6476 | 0.9404 |
| 52 | 301 | 0.3907 | 0.9822 | 0.6206 | 0.9559 | 356 | 0.3539 | 0.9824 | 0.627  | 0.9478 | 409 | 0.3295 | 0.9831 | 0.6463 | 0.94   |
| 53 | 303 | 0.3866 | 0.9827 | 0.6242 | 0.9556 | 358 | 0.3503 | 0.9828 | 0.6307 | 0.9475 | 412 | 0.3246 | 0.9834 | 0.6471 | 0.9396 |
| 54 | 303 | 0.3866 | 0.9828 | 0.6262 | 0.9556 | 358 | 0.3503 | 0.983  | 0.6328 | 0.9475 | 412 | 0.3246 | 0.9836 | 0.6492 | 0.9396 |

|    |     |        |        |        |        |     |        |        |        |        |     |        |        |        |        |
|----|-----|--------|--------|--------|--------|-----|--------|--------|--------|--------|-----|--------|--------|--------|--------|
| 55 | 304 | 0.3846 | 0.983  | 0.6271 | 0.9555 | 359 | 0.3485 | 0.9831 | 0.6337 | 0.9474 | 413 | 0.323  | 0.9837 | 0.6502 | 0.9395 |
| 56 | 305 | 0.3826 | 0.9836 | 0.6342 | 0.9554 | 360 | 0.3466 | 0.9837 | 0.6409 | 0.9473 | 414 | 0.3213 | 0.9844 | 0.6577 | 0.9394 |
| 57 | 305 | 0.3826 | 0.9845 | 0.6473 | 0.9554 | 360 | 0.3466 | 0.9846 | 0.6541 | 0.9474 | 414 | 0.3213 | 0.9853 | 0.6712 | 0.9395 |
| 58 | 307 | 0.3785 | 0.9846 | 0.6471 | 0.9551 | 362 | 0.343  | 0.9848 | 0.654  | 0.9471 | 416 | 0.318  | 0.9854 | 0.6713 | 0.9392 |
| 59 | 308 | 0.3765 | 0.9849 | 0.6503 | 0.955  | 363 | 0.3412 | 0.9851 | 0.6573 | 0.947  | 417 | 0.3164 | 0.9857 | 0.6748 | 0.9391 |
| 60 | 311 | 0.3704 | 0.9851 | 0.6489 | 0.9546 | 366 | 0.3358 | 0.9853 | 0.656  | 0.9466 | 420 | 0.3115 | 0.9859 | 0.6738 | 0.9387 |
| 61 | 315 | 0.3623 | 0.9851 | 0.6439 | 0.954  | 370 | 0.3285 | 0.9853 | 0.6511 | 0.946  | 424 | 0.3049 | 0.9859 | 0.6691 | 0.9381 |
| 62 | 318 | 0.3563 | 0.9857 | 0.6494 | 0.9536 | 373 | 0.323  | 0.9859 | 0.6568 | 0.9456 | 428 | 0.2984 | 0.9863 | 0.6716 | 0.9376 |
| 63 | 321 | 0.3502 | 0.9857 | 0.6455 | 0.9532 | 376 | 0.3176 | 0.9859 | 0.653  | 0.9452 | 431 | 0.2934 | 0.9863 | 0.6679 | 0.9372 |
| 64 | 322 | 0.3482 | 0.9857 | 0.6442 | 0.9531 | 377 | 0.3158 | 0.9859 | 0.6517 | 0.9451 | 432 | 0.2918 | 0.9863 | 0.6667 | 0.9371 |
| 65 | 322 | 0.3482 | 0.986  | 0.6491 | 0.9531 | 377 | 0.3158 | 0.9862 | 0.6566 | 0.9451 | 432 | 0.2918 | 0.9867 | 0.6717 | 0.9371 |
| 66 | 322 | 0.3482 | 0.9863 | 0.654  | 0.9531 | 377 | 0.3158 | 0.9865 | 0.6616 | 0.9451 | 433 | 0.2902 | 0.9868 | 0.673  | 0.9369 |
| 67 | 324 | 0.3441 | 0.9866 | 0.6564 | 0.9528 | 379 | 0.3122 | 0.9868 | 0.6641 | 0.9448 | 435 | 0.2869 | 0.9871 | 0.6757 | 0.9367 |
| 68 | 325 | 0.3421 | 0.9869 | 0.6602 | 0.9527 | 380 | 0.3103 | 0.9871 | 0.668  | 0.9447 | 436 | 0.2852 | 0.9874 | 0.6797 | 0.9366 |
| 69 | 325 | 0.3421 | 0.9869 | 0.6602 | 0.9527 | 380 | 0.3103 | 0.9871 | 0.668  | 0.9447 | 436 | 0.2852 | 0.9874 | 0.6797 | 0.9366 |
| 70 | 328 | 0.336  | 0.9873 | 0.664  | 0.9523 | 383 | 0.3049 | 0.9875 | 0.672  | 0.9443 | 440 | 0.2787 | 0.9877 | 0.68   | 0.936  |
| 71 | 329 | 0.334  | 0.9875 | 0.6653 | 0.9522 | 384 | 0.3031 | 0.9877 | 0.6734 | 0.9442 | 441 | 0.277  | 0.9879 | 0.6815 | 0.9359 |
| 72 | 330 | 0.332  | 0.9878 | 0.6694 | 0.9521 | 385 | 0.3013 | 0.988  | 0.6776 | 0.9441 | 442 | 0.2754 | 0.9882 | 0.6857 | 0.9358 |
| 73 | 332 | 0.3279 | 0.9878 | 0.6667 | 0.9518 | 387 | 0.2976 | 0.988  | 0.6749 | 0.9438 | 444 | 0.2721 | 0.9882 | 0.6831 | 0.9355 |
| 74 | 332 | 0.3279 | 0.9878 | 0.6667 | 0.9518 | 387 | 0.2976 | 0.988  | 0.6749 | 0.9438 | 444 | 0.2721 | 0.9882 | 0.6831 | 0.9355 |
| 75 | 334 | 0.3239 | 0.9878 | 0.6639 | 0.9515 | 389 | 0.294  | 0.988  | 0.6722 | 0.9435 | 446 | 0.2689 | 0.9882 | 0.6805 | 0.9353 |
| 76 | 335 | 0.3219 | 0.9881 | 0.6681 | 0.9514 | 390 | 0.2922 | 0.9883 | 0.6765 | 0.9434 | 448 | 0.2656 | 0.9883 | 0.6807 | 0.935  |
| 77 | 336 | 0.3198 | 0.9887 | 0.6781 | 0.9513 | 391 | 0.2904 | 0.9889 | 0.6867 | 0.9433 | 449 | 0.2639 | 0.989  | 0.691  | 0.9349 |
| 78 | 336 | 0.3198 | 0.9888 | 0.681  | 0.9513 | 391 | 0.2904 | 0.9891 | 0.6897 | 0.9433 | 449 | 0.2639 | 0.9891 | 0.694  | 0.9349 |
| 79 | 337 | 0.3178 | 0.989  | 0.6826 | 0.9512 | 392 | 0.2886 | 0.9892 | 0.6913 | 0.9432 | 450 | 0.2623 | 0.9893 | 0.6957 | 0.9348 |
| 80 | 338 | 0.3158 | 0.989  | 0.6812 | 0.951  | 393 | 0.2868 | 0.9892 | 0.69   | 0.9431 | 451 | 0.2607 | 0.9893 | 0.6943 | 0.9346 |
| 81 | 340 | 0.3117 | 0.9893 | 0.6844 | 0.9508 | 395 | 0.2831 | 0.9895 | 0.6933 | 0.9428 | 453 | 0.2574 | 0.9896 | 0.6978 | 0.9344 |
| 82 | 342 | 0.3077 | 0.9896 | 0.6878 | 0.9505 | 397 | 0.2795 | 0.9898 | 0.6968 | 0.9425 | 455 | 0.2541 | 0.9899 | 0.7014 | 0.9341 |
| 83 | 343 | 0.3057 | 0.9899 | 0.6927 | 0.9504 | 398 | 0.2777 | 0.9901 | 0.7018 | 0.9424 | 456 | 0.2525 | 0.9902 | 0.7064 | 0.934  |
| 84 | 345 | 0.3016 | 0.9899 | 0.6898 | 0.9501 | 400 | 0.274  | 0.9901 | 0.6991 | 0.9421 | 458 | 0.2492 | 0.9902 | 0.7037 | 0.9338 |

|     |     |        |        |        |        |     |        |        |        |        |     |        |        |        |        |
|-----|-----|--------|--------|--------|--------|-----|--------|--------|--------|--------|-----|--------|--------|--------|--------|
| 85  | 346 | 0.2996 | 0.9902 | 0.6948 | 0.95   | 401 | 0.2722 | 0.9904 | 0.7042 | 0.942  | 459 | 0.2475 | 0.9905 | 0.7089 | 0.9336 |
| 86  | 346 | 0.2996 | 0.9902 | 0.6948 | 0.95   | 401 | 0.2722 | 0.9904 | 0.7042 | 0.942  | 459 | 0.2475 | 0.9905 | 0.7089 | 0.9336 |
| 87  | 347 | 0.2976 | 0.9904 | 0.6967 | 0.9498 | 402 | 0.2704 | 0.9906 | 0.7062 | 0.9419 | 460 | 0.2459 | 0.9906 | 0.7109 | 0.9335 |
| 88  | 349 | 0.2935 | 0.9905 | 0.6971 | 0.9496 | 404 | 0.2668 | 0.9907 | 0.7067 | 0.9416 | 462 | 0.2426 | 0.9908 | 0.7115 | 0.9333 |
| 89  | 349 | 0.2935 | 0.9907 | 0.7005 | 0.9496 | 404 | 0.2668 | 0.9909 | 0.7101 | 0.9416 | 462 | 0.2426 | 0.991  | 0.715  | 0.9333 |
| 90  | 350 | 0.2915 | 0.9907 | 0.699  | 0.9495 | 405 | 0.265  | 0.9909 | 0.7087 | 0.9415 | 463 | 0.241  | 0.991  | 0.7136 | 0.9331 |
| 91  | 353 | 0.2854 | 0.991  | 0.7015 | 0.9491 | 409 | 0.2577 | 0.991  | 0.7065 | 0.941  | 467 | 0.2344 | 0.9911 | 0.7114 | 0.9326 |
| 92  | 354 | 0.2834 | 0.9911 | 0.7035 | 0.9489 | 410 | 0.2559 | 0.9912 | 0.7085 | 0.9408 | 468 | 0.2328 | 0.9913 | 0.7136 | 0.9325 |
| 93  | 355 | 0.2814 | 0.9913 | 0.7056 | 0.9488 | 411 | 0.2541 | 0.9913 | 0.7107 | 0.9407 | 469 | 0.2311 | 0.9914 | 0.7157 | 0.9324 |
| 94  | 355 | 0.2814 | 0.9913 | 0.7056 | 0.9488 | 411 | 0.2541 | 0.9913 | 0.7107 | 0.9407 | 469 | 0.2311 | 0.9914 | 0.7157 | 0.9324 |
| 95  | 355 | 0.2814 | 0.9914 | 0.7092 | 0.9488 | 411 | 0.2541 | 0.9915 | 0.7143 | 0.9407 | 469 | 0.2311 | 0.9916 | 0.7194 | 0.9324 |
| 96  | 355 | 0.2814 | 0.9916 | 0.7128 | 0.9488 | 411 | 0.2541 | 0.9916 | 0.7179 | 0.9407 | 469 | 0.2311 | 0.9917 | 0.7231 | 0.9324 |
| 97  | 356 | 0.2794 | 0.9917 | 0.715  | 0.9487 | 412 | 0.2523 | 0.9918 | 0.7202 | 0.9406 | 470 | 0.2295 | 0.9919 | 0.7254 | 0.9322 |
| 98  | 357 | 0.2773 | 0.9919 | 0.7173 | 0.9486 | 413 | 0.2505 | 0.9919 | 0.7225 | 0.9405 | 471 | 0.2279 | 0.992  | 0.7277 | 0.9321 |
| 99  | 357 | 0.2773 | 0.9919 | 0.7173 | 0.9486 | 413 | 0.2505 | 0.9919 | 0.7225 | 0.9405 | 471 | 0.2279 | 0.992  | 0.7277 | 0.9321 |
| 100 | 358 | 0.2753 | 0.9919 | 0.7158 | 0.9484 | 414 | 0.2486 | 0.9919 | 0.7211 | 0.9403 | 472 | 0.2262 | 0.992  | 0.7263 | 0.932  |

Table S3. Between-site variation in AMI incidence and hsTnT test characteristics.

|                                                             | Site 1                  | Site 2                | Site 3                | Site 4                |
|-------------------------------------------------------------|-------------------------|-----------------------|-----------------------|-----------------------|
| <b>Patients</b>                                             | <b>1894</b>             | <b>2494</b>           | <b>1427</b>           | <b>1315</b>           |
| <b>Patients with 7-day AMI (%)</b>                          | <b>134 (7.07%)</b>      | <b>134 (5.37%)</b>    | <b>87 (6.09%)</b>     | <b>56 (4.26%)</b>     |
| <b>Patients ruled out with hsTnT &lt;3ng/L</b>              | <b>260 (13.7%)</b>      | <b>369 (14.8%)</b>    | <b>172 (12.1%)</b>    | <b>302 (22.9%)</b>    |
| <b>Sensitivity of hsTnT&lt;3ng/L for 7-day AMI (95% CI)</b> | <b>100 (95.9,100)</b>   | <b>100 (95.9,100)</b> | <b>100 (93.8,100)</b> | <b>100 (90.6,100)</b> |
| <b>Patients ruled out with hsTnT &lt;5ng/L</b>              | <b>569 (30.4%)</b>      | <b>793 (31.8%)</b>    | <b>398 (27.9%)</b>    | <b>639 (48.6%)</b>    |
| <b>Sensitivity of hsTnT&lt;5ng/L for 7-day AMI (95% CI)</b> | <b>99.2 (95.9,99.9)</b> | <b>100 (95.9,100)</b> | <b>100 (93.8,100)</b> | <b>100 (90.6,100)</b> |
